# Supplementary material for: Genome-Wide Identification of the Physic Nut WUSCHEL-Related Homeobox Gene Family and Functional Analysis of the Abiotic Stress Responsive Gene JcWOX5
Source: Front Genet. 2020 Jun 19;11:670. doi: 10.3389/fgene.2020.00670 (PMC7325900; doi:10.3389/fgene.2020.00670)
Supplement: TABLE S2 — Summary of JcWOX genes encoding WOX proteins in physic nut. [file Table_2.xlsx]

## Sheet: Sheet1
Supplemental Data S2. Summary of JcWOX genes encoding WOX proteins in physic nut.
Genes	Gene ID	protein length (aa)	ORF length	pI	MW	Location	Domain	Group
			(bp)		(kDa)
JcWOX1	JCGZ_05687	237	714	9.01	26.8	LG2	HD	WUS
JcWOX2	JCGZ_05620	224	675	7.27	25.9	LG2	HD	WUS
JcWOX3	JCGZ_04708	322	969	8.98	37.7	LG2	HD	WUS
JcWOX4	JCGZ_21504	410	1233	7.23	45.2	LG3	HD	Indermediate
JcWOX5	JCGZ_16109	217	654	9.51	24.9	LG3	HD	WUS
JcWOX6	JCGZ_08069	208	627	5.15	23.7	LG3	HD	Ancient
JcWOX7	JCGZ_02654	266	801	6.08	28.8	LG3	HD	Indermediate
JcWOX8	JCGZ_22398	258	777	5.35	29.3	LG4	HD	Ancient
JcWOX9	JCGZ_06524	309	930	6.18	34.9	LG5	HD	WUS
JcWOX10	JCGZ_06525	312	939	5.85	35.7	LG5	HD	WUS
JcWOX11	JCGZ_01318	190	573	9.19	21.7	LG5	HD	WUS
JcWOX12	JCGZ_27080	392	1179	7.65	43.9	LG6	HD	WUS
