# Supplementary material for: Genome-Wide Identification of the Physic Nut WUSCHEL-Related Homeobox Gene Family and Functional Analysis of the Abiotic Stress Responsive Gene JcWOX5
Source: Front Genet. 2020 Jun 19;11:670. doi: 10.3389/fgene.2020.00670 (PMC7325900; doi:10.3389/fgene.2020.00670)
Supplement: TABLE S3 — Sequences of proteins encoded by WOX genes in Arabidopsis, rice, soybean, and poplar. [file Table_3.xlsx]

## Sheet: Sheet1
Supplemental Data S3. Signal strength values for the expression of 12 JcWOX genes in tested tissues (root, stem cortex, leaf, and seed) based on RNA-seq.
** "0.00" The expresion is not available
*TPM (number of transcripts per million tags).
Physic nut	Expression level in different tissues (TPM)*
Gene name	Roots	Stem cortex	Leaves	S1	S2
JcWOX1	1.81	"0.00"**	0	0.17	0
JcWOX2	0	0	0	0	0
JcWOX3	0.38	0.48	0	7.97	0
JcWOX4	0.2	0	0	0	0.52
JcWOX5	114.5	38.47	4.49	0	0.52
JcWOX6	19.93	1.61	1.84	13.86	2.54
JcWOX7	0.62	0	0	0	5.3375
JcWOX8	220.59	79.24	42.44	83.44	50.14
JcWOX9	0.06	0	0	0.52	0
JcWOX10	0.15	0.36	0	0.35	0
JcWOX11	0.06	0	0	0	0
JcWOX12	0	0.15	4.21	12.39	0.23
